# Supplementary material
Source: publisher figshare collection journal article supplement (https://acs.figshare.com/ndownloader/files/21094575)
Supplement: Supplementary file 1 [file 21094575]

## Supporting Information

### **Rational Design of Electrochemical Iodine-based Redox Mediators for Water-Proofed Flexible Fiber Supercapacitors**

*Yeonsu Park,<sup>†,¶</sup> Hyeonggeun Choi,<sup>†,¶</sup> Dong-Gyu Lee,<sup>†</sup> Min-Cheol Kim,<sup>‡</sup> Nguyen Anh Thu  
Tran,<sup>†</sup> Younghyun Cho,<sup>†</sup> Young-Woo Lee,<sup>\*,†</sup> and Jung Inn Sohn<sup>\*,‡</sup>*

<sup>†</sup> Department of Energy Systems, Soonchunhyang University, 22 Soonchunhyang-ro,  
Shinchang-myeon, Asan-si, Chungcheongnam-do 31538, Republic of Korea

<sup>‡</sup> Division of Physics and Semiconductor Science, Dongguk University-Seoul, 30 Pildong-ro  
1gil, Jung-gu, Seoul 04620, Republic of Korea

<sup>¶</sup>Y. P. & H. C. contributed equally to this work.

#### **Corresponding Author**

E-mail address:

ywlee@sch.ac.kr (Prof. Y.-W. Lee)

junginn.sohn@dongguk.edu (Prof. J. I. Sohn)

General Content of Supporting Informaton (SI) file:

- Total number of SI pages: 5 pages
- Total number of figures: 4 figures

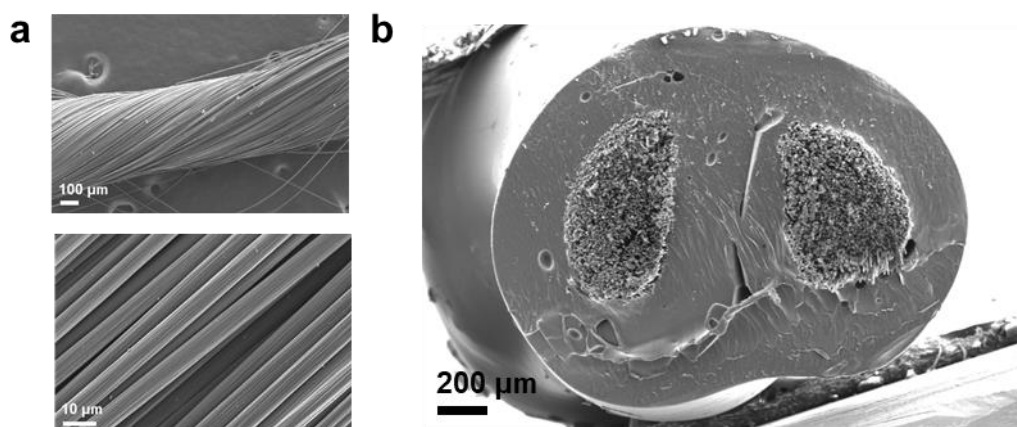

**Figure S1.** (a) SEM and HR-SEM images of the as-prepared carbon fiber yarns. (b) Cross sectional SEM image of the f-FESS with KI.

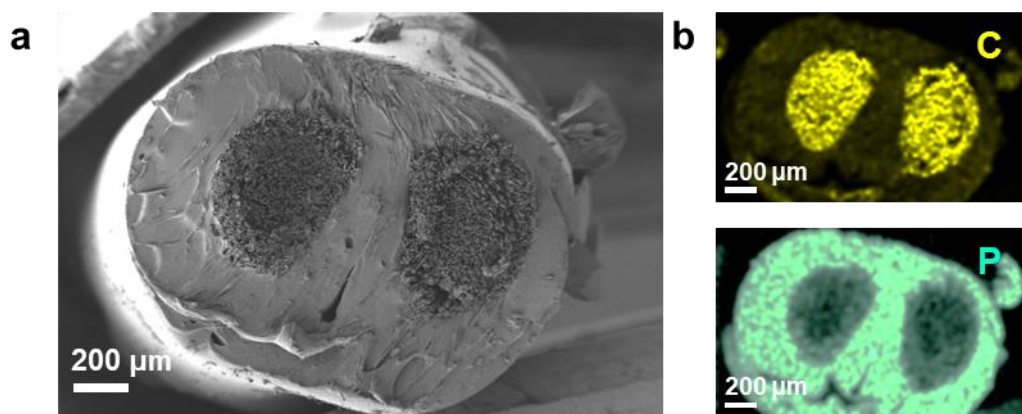

**Figure S2.** (a) Cross-sectional SEM image of the pure f-FESS. (b) EDX elemental mapping images of the pure f-FESS.

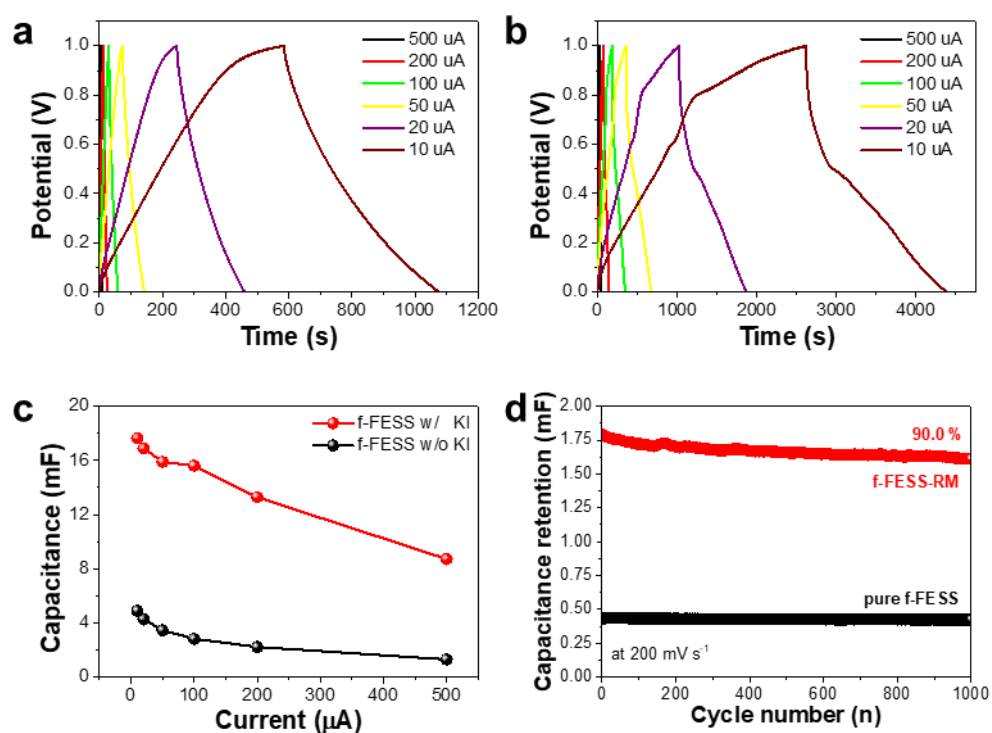

**Figure S3.** Galvanostatic charge/discharge curves of (a) the f-FESS-RM and (b) the pure f-FESS at different current ranges. Comparison of (c) capacitance and (d) cyclability for the f-FESS-RM and the pure f-FESS.

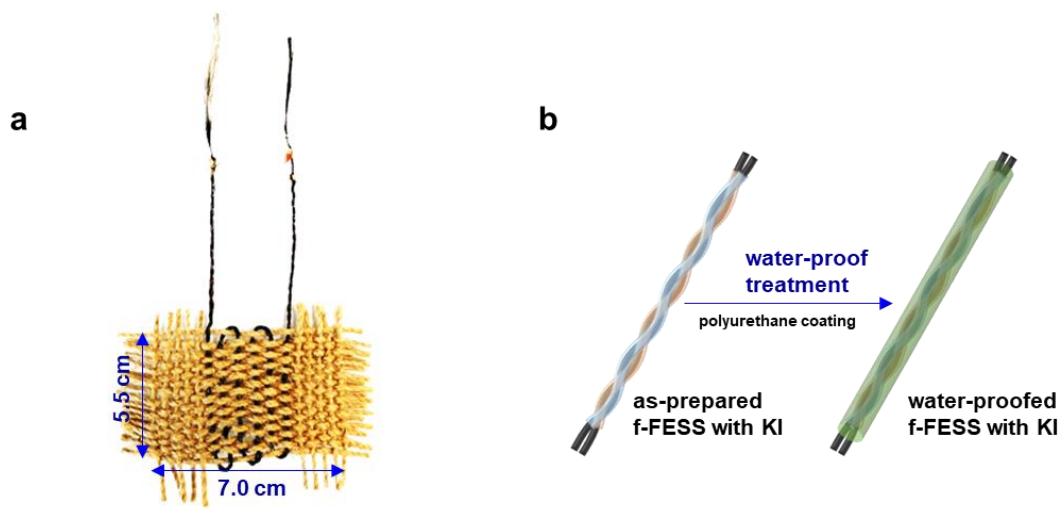

**Figure S4.** (a) Photographs of the fabricated f-FESS-RM weaved on a cross-stitch board (area of  $7.0 \times 5.5 \text{ cm}^2$ ). (b) Schematic illustration of fabrication process of the water-proofed f-FESS-RM.
